# Supplementary material for: High-dose diquat poisoning: a case report
Source: PubMed Central journal article supplement — J Int Med Res. 2021 Jun 29;49(6):03000605211026117. doi: 10.1177/03000605211026117 (PMC8246526; doi:10.1177/03000605211026117), 2021-06-29
Supplement: sj-pdf-1-imr-10.1177_03000605211026117.pdf [file sj-pdf-1-imr-10.1177_03000605211026117.pdf]

1  
2  
3  
4  
5  
6  
7  
8  
9  
10  
11  
12  
13  
14  
15

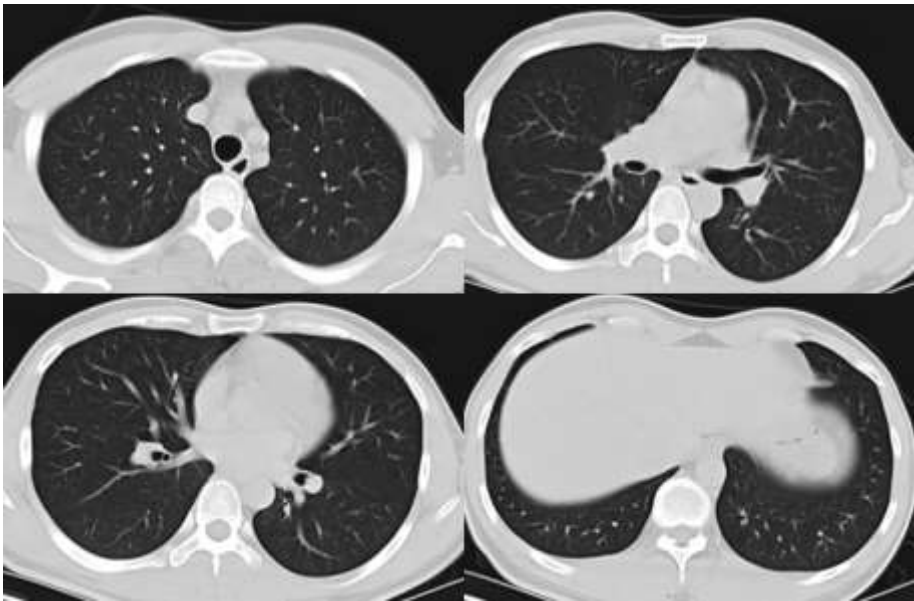

Figure 1. Chest CT on the day the patient orally took diquat.

16  
17  
18  
19  
20  
21  
22  
23  
24  
25  
26  
27  
28  
29  
30  
31  
32  
33  
34  
35  
36

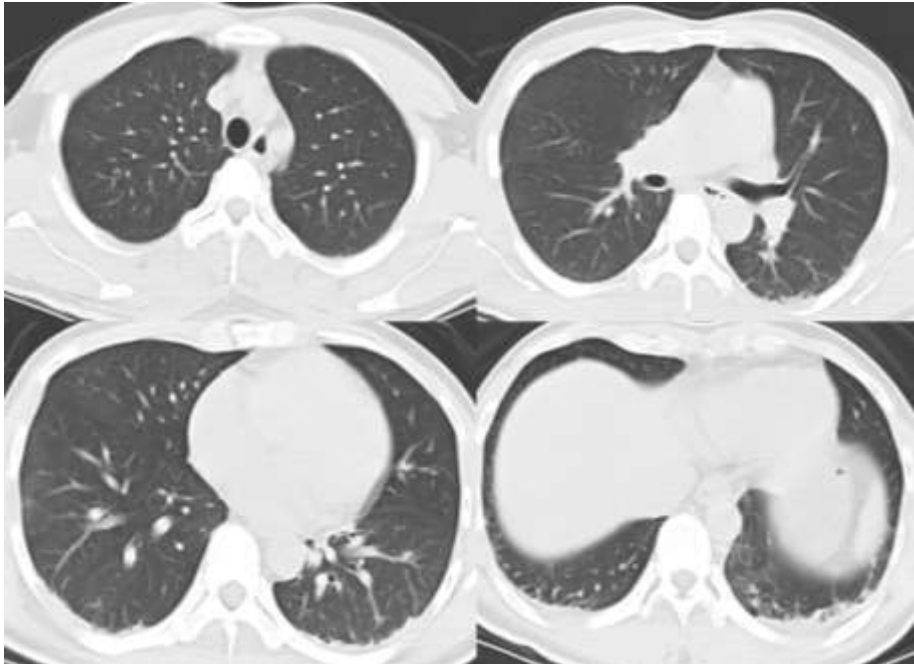

Figure 2. Chest CT on third day after the patient orally took diquat. The first day when the patient came to ICU (Day 1)

37  
38  
39

40  
41  
42  
43  
44  
45  
46  
47  
48  
49  
50  
51  
52  
53  
54  
55  
56  
57  
58  
59  
60  
61  
62  
63  
64  
65  
66  
67  
68  
69  
70  
71  
72  
73  
74  
75  
76  
77  
78  
79  
80  
81  
82  
83

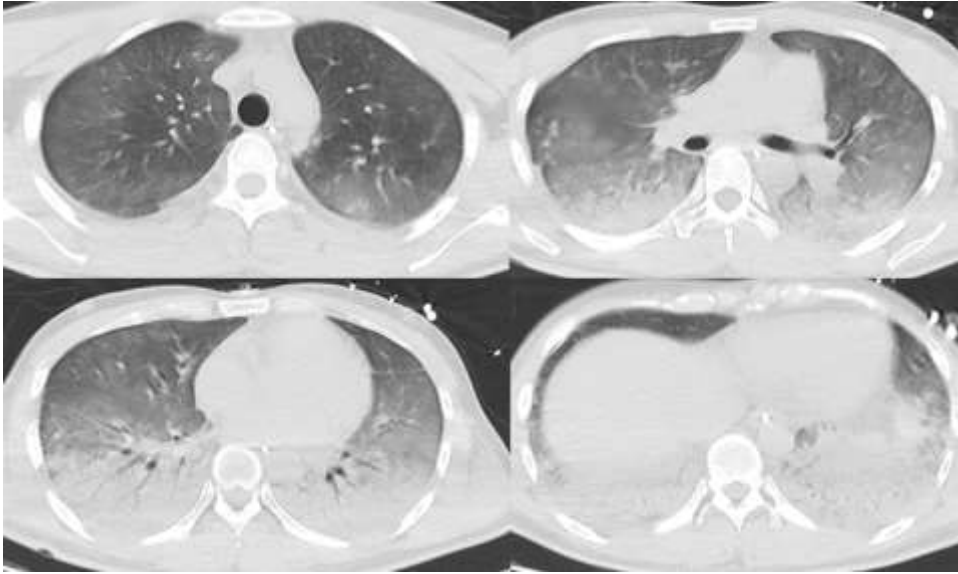

Figure 3. Chest CT on the third day after the patient came to ICU (Day 3)

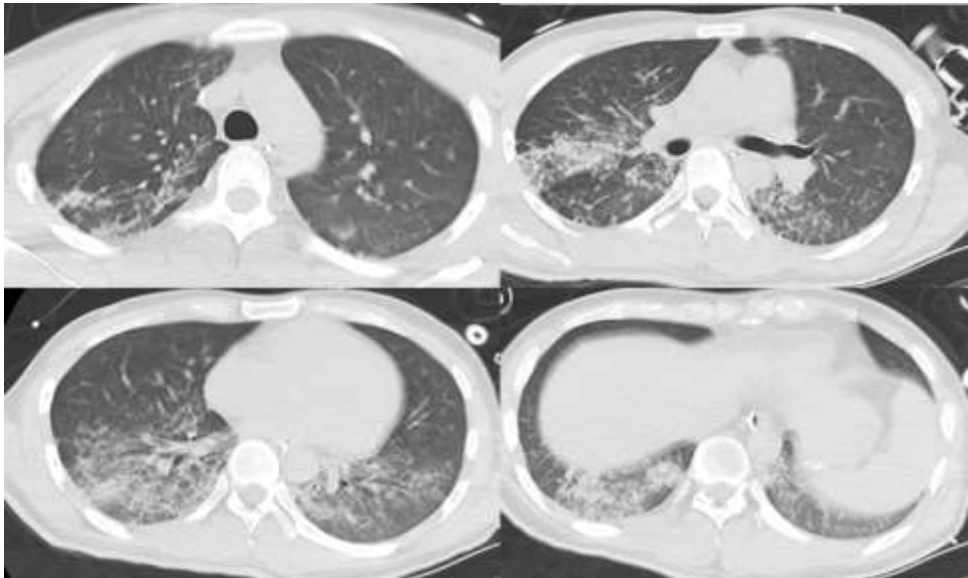

Figure 4. Chest CT on the sixth day after the patient came to ICU (Day 6)

84  
85  
86  
87  
88  
89  
90  
91  
92  
93  
94  
95  
96  
97  
98  
99  
100  
101  
102  
103  
104  
105  
106

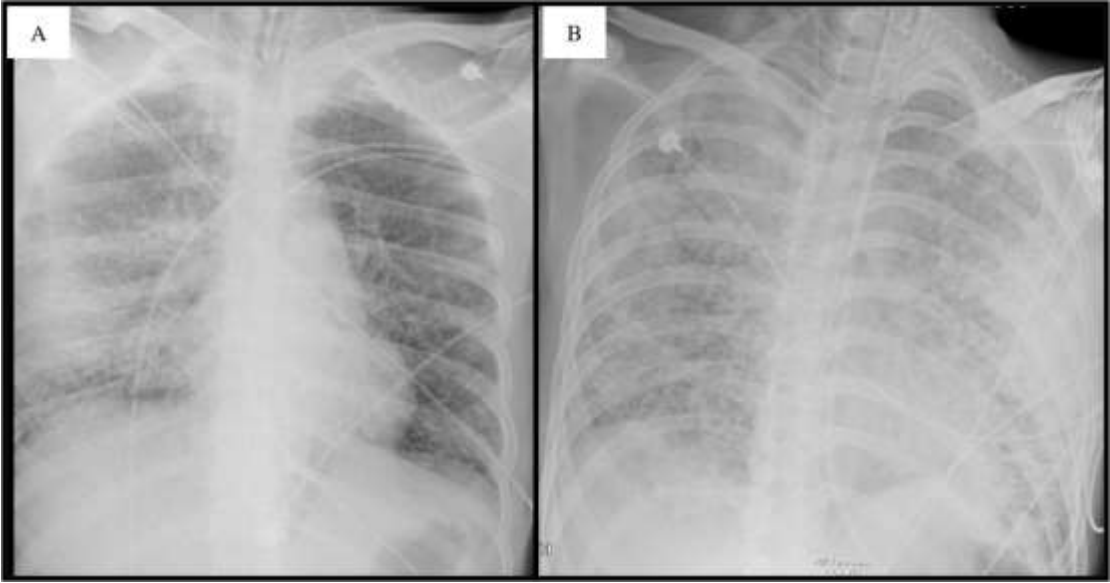

Figure 5. Chest radiograph on the tenth day (A) and eleventh day (B) after the patient came to ICU
